# Supplementary material
Source: MDPI journal article supplement (https://www.mdpi.com/2673-8945/3/2/10)
Supplement: s1 [file s1]

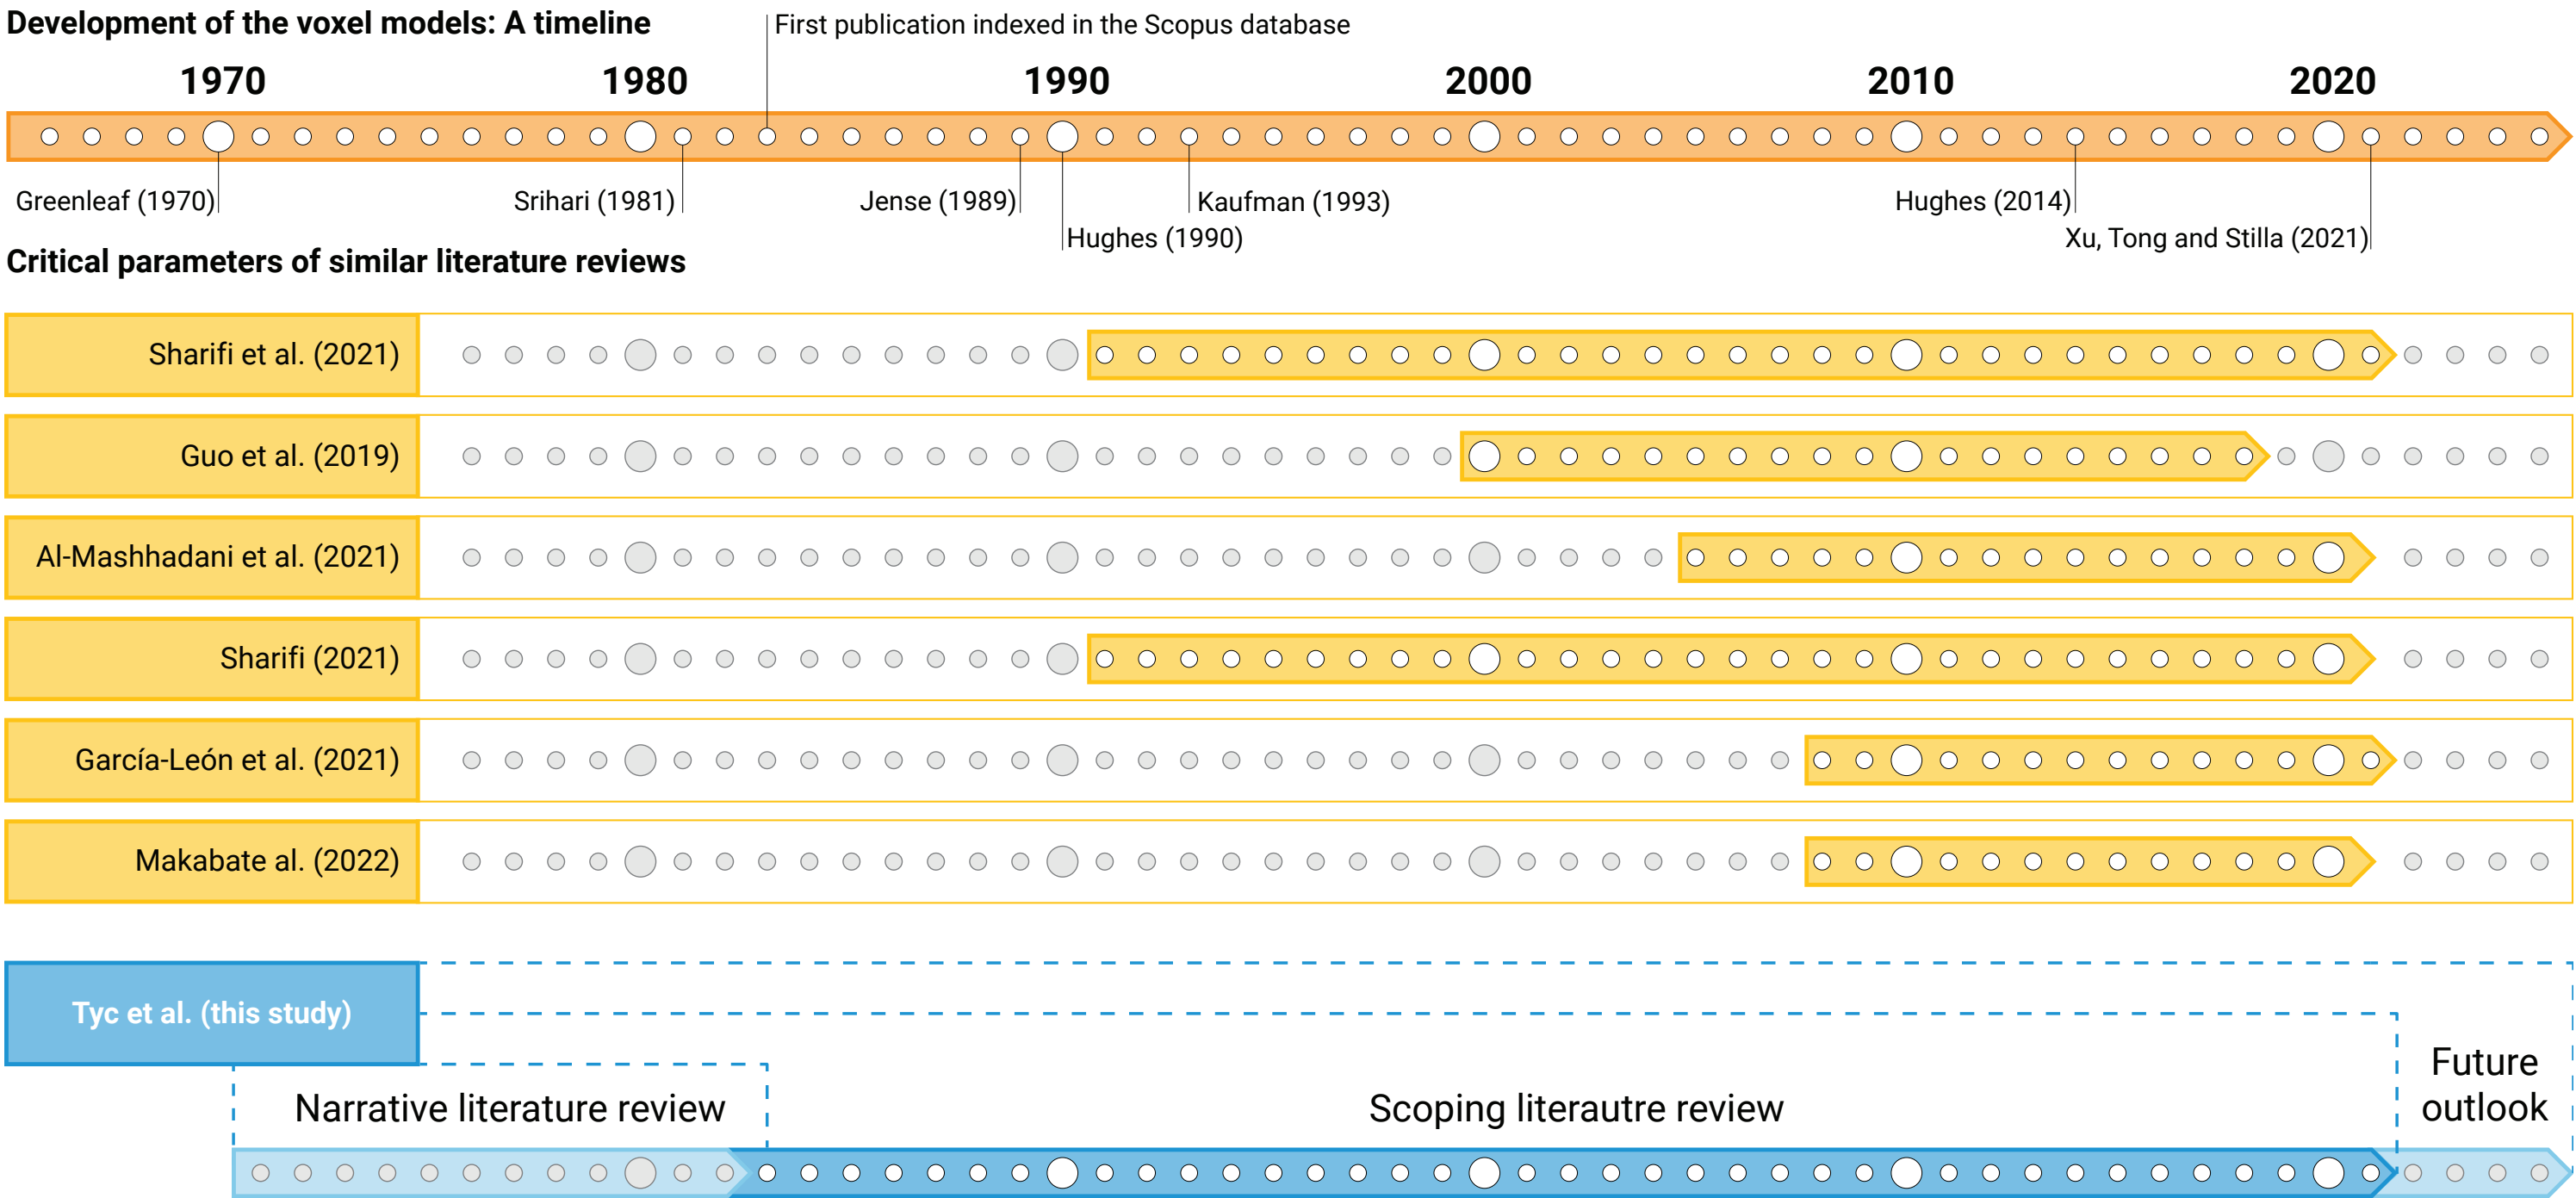

Figure S1. Timeline comparing the time periods of similar disciplinary literature reviews. The reviews listed in the table are related to the interdisciplinary field of study covered by this publication, although none of the reviews address the topic of voxel models directly. The time span for the scoping review part in this study is chosen based on this comparison. The periods for the narrative parts of this review are chosen based on the initial research summarized in the voxel model development timeline at the top.

Journal articles related to voxels published per year excluding medical publications based on Scopus ASJC Journal Codes

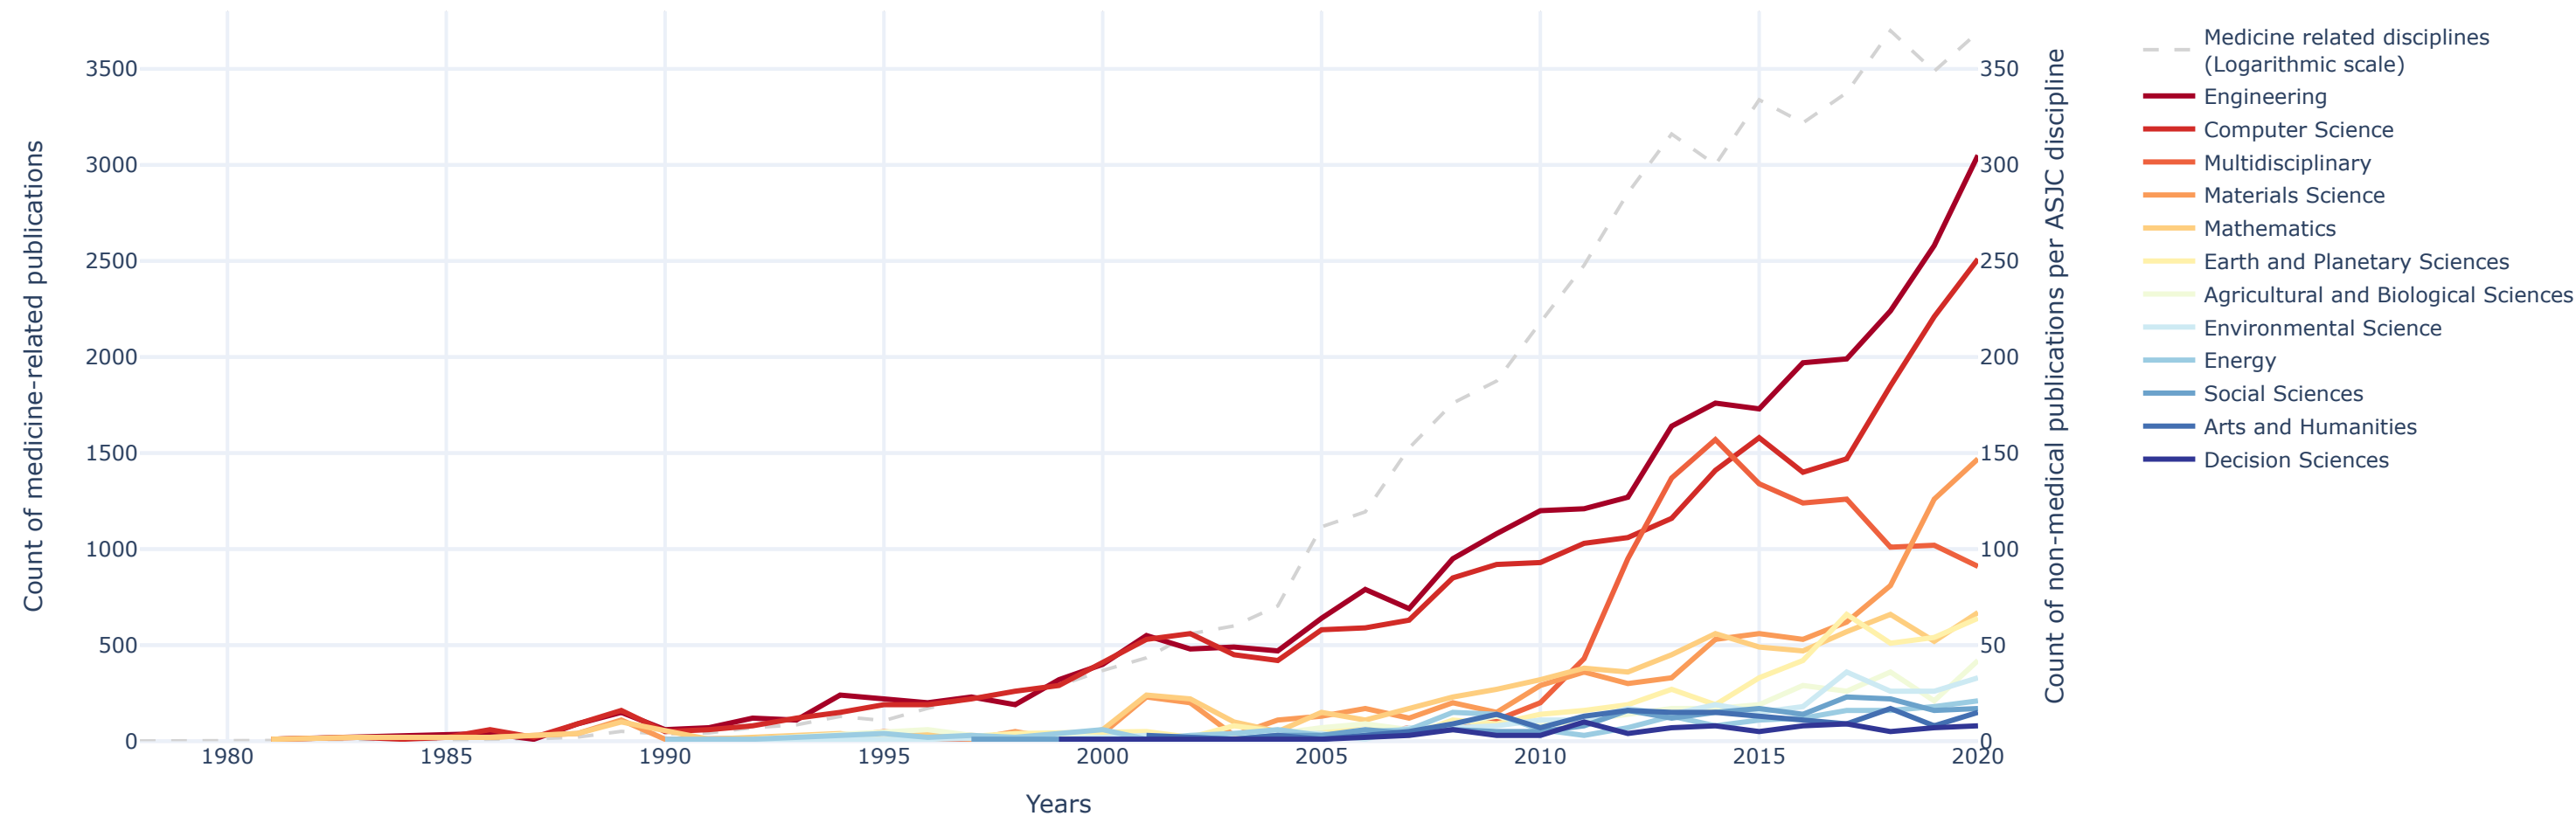

Figure S2. Disciplinary distribution of the voxel-related papers related to the year of publication based on the Scopus All Science Journal Classification Codes. The medicine-related publications are indicated by the gray dashed line plotted on a logarithmic scale to compensate for the publication volumes of a different order of magnitude.

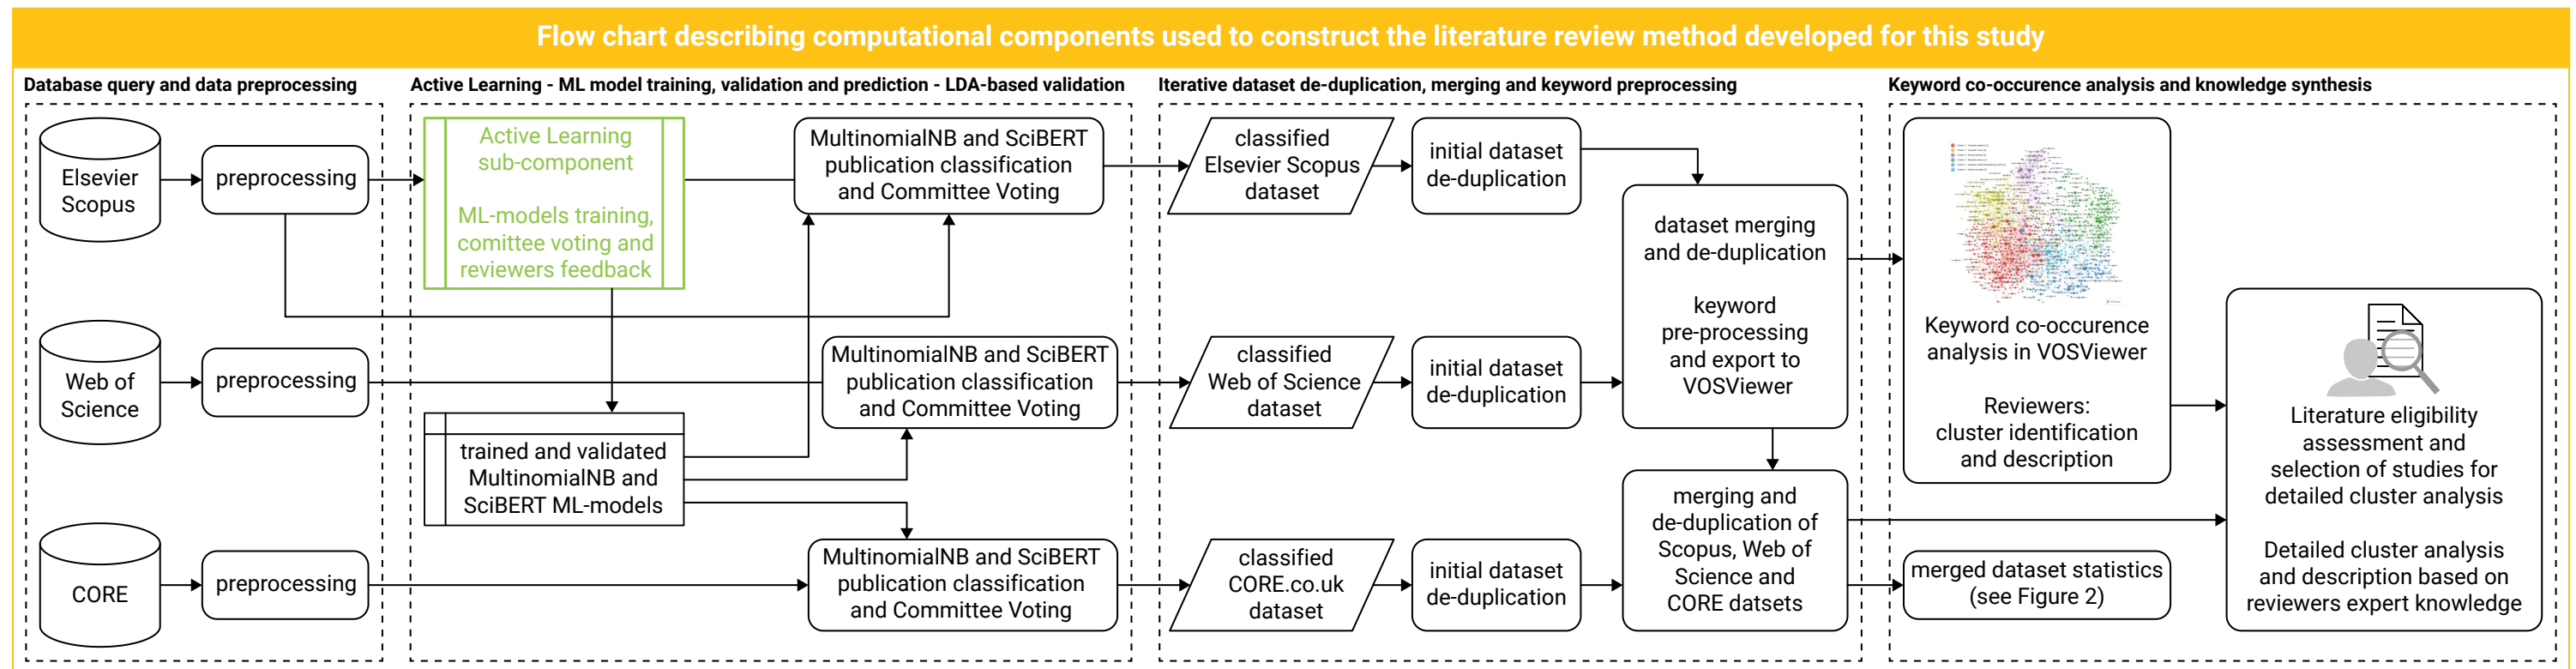

Figure S3. General workflow describing the NLP-based screening method applied in this study for the initial screening, followed by the keyword co-occurrence network analysis and a detailed study of the clusters - alternative, horizontal layout.

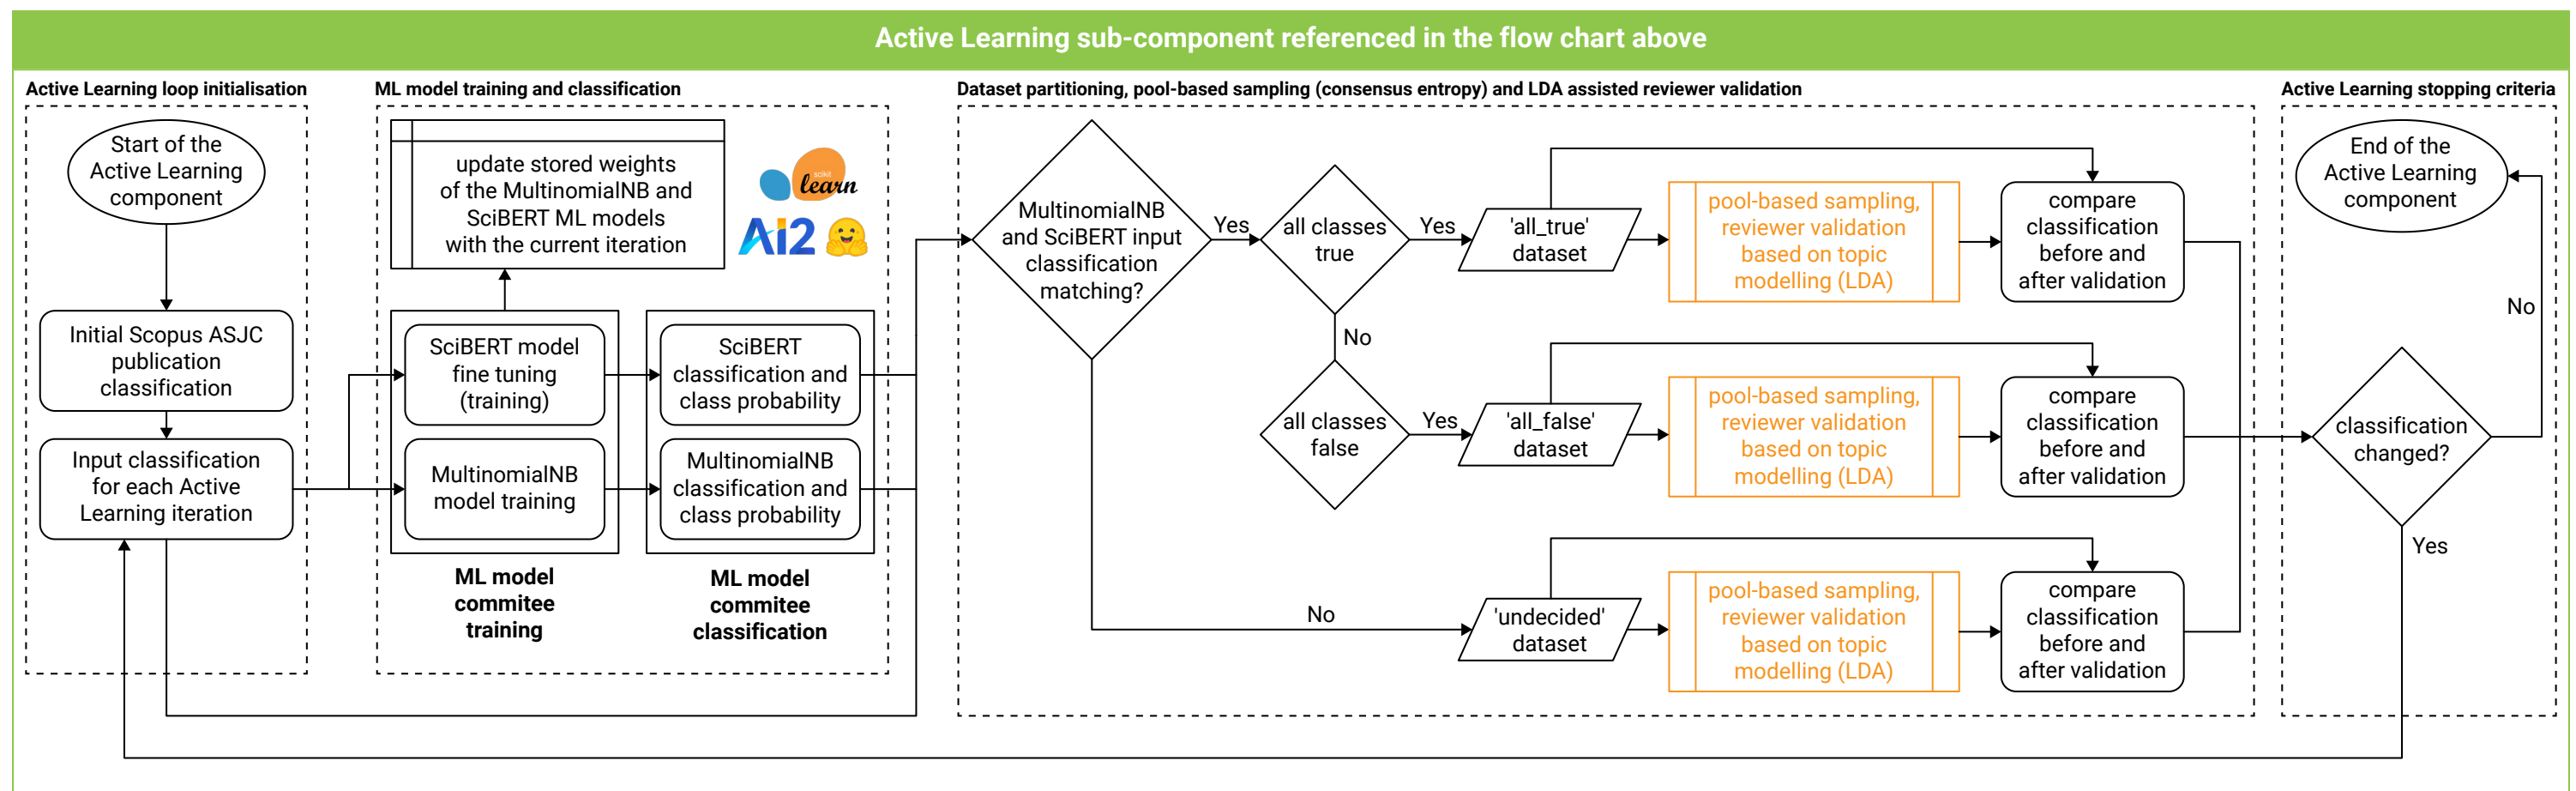

Figure S4. Flow chart describing the algorithmic implementation of the active learning component - alternative, horizontal layout.

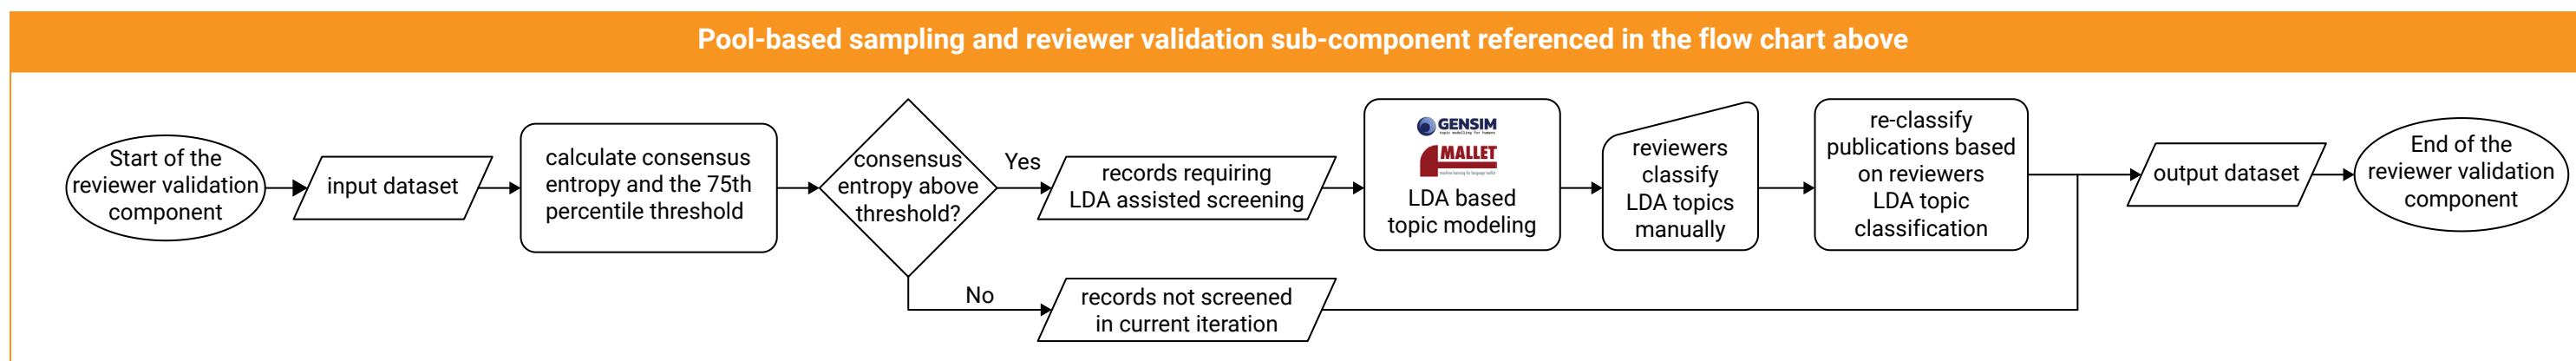

Figure S5. Flow chart describing the algorithmic implementation of the pool-based sampling and the topic modeling-based reviewer validation component - alternative, horizontal layout.

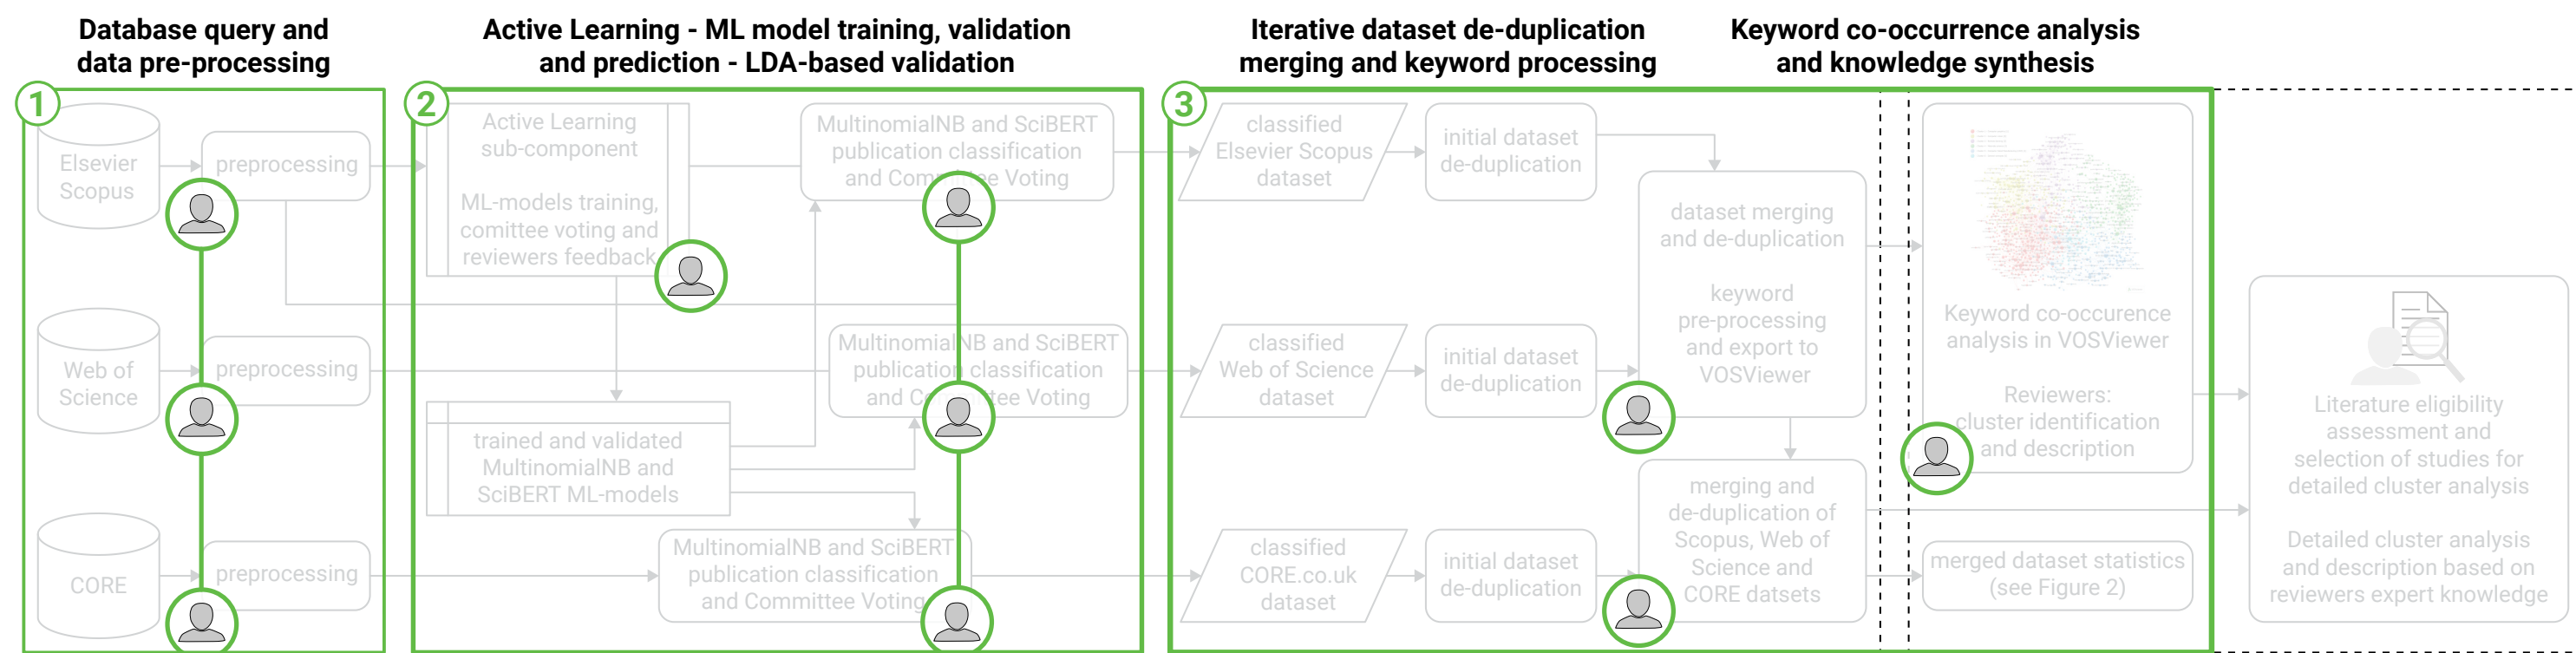

Figure S6. Role of the reviewers in validating the outcomes of the NLP-based screening method to minimize the risk of bias. The validation steps are linked to the workflow components from Figure 4 and assigned with the numbers used in the detailed description below - alternative, horizontal layout.
